# Supplementary material for: Prognostic Accuracy of Three COPD Classification Systems in Relation to Long-Term Mortality of COPD Patients: A Prospective Multicenter Study
Source: Springer Nature journal article supplement (doi:10.1007/s00408-019-00196-6), 2019-01-29
Supplement: MOESM1 [file 16427516]

**Supplementary Table 1.** Distribution of clinical symptoms, quality of life measures and specific treatments in relation to GOLD pre-2011 stages („I-IV“) (n=720)

|  | Total | GOLD pre-2011 („I-IV“) | | | P-value |
| --- | --- | --- | --- | --- | --- |
| 2 | 3 | 4 |
| Fatigue | 336 (47.2%) | 104 (39.4%) | 178 (50.1%) | 54 (58.1%) | **0.002** |
| Cough | 523 (72.6%) | 193 (72.6%) | 263 (72.9%) | 67 (72.0%) | 0.986 |
| Expectoration | 422 (58.6%) | 145 (54.5%) | 228 (63.2%) | 49 (52.7%) | **0.043** |
| Purulent sputum | 39 (5.4%) | 7 (2.6%) | 26 (7.2%) | 6 (6.5%) | **0.031** |
| Haemoptysis | 37 (5.1%) | 18 (6.8%) | 14 (3.9%) | 5 (5.4%) | 0.259 |
| SNOT | n=572;  16.9 (15.3);  12.5 (0.0; 48.0) | n=211;  15.9 (15.0);  11.0 (0.0; 47.0) | n=283;  17.1 (15.4);  13.0 (0.0; 46.0) | n=78;  19.1 (15.5);  15.0 (2.0; 49.0) | 0.111 |
| SGRQ – T | n=242;  47.4 (18.8);  49.3 (15.3; 76.3) | n=78;  37.9 (18.5);  38.6 (7.9; 67.0) | n=125;  50.1 (17.6);  50.8 (23.8; 77.3) | n=39;  57.8 (14.6);  56.9 (33.2; 87.0) | **<0.001** |
| SGRQ – I | n=255;  39.0 (20.6);  38.2 (6.7; 73.2) | n=83;  30.0 (19.4);  31.7 (1.7; 61.5) | n=132;  41.6 (19.9);  40.5 (12.9; 78.0) | n=40;  49.3 (18.3);  49.8 (21.3; 85.6) | **<0.001** |
| SGRQ – A | n=255;  62.2 (21.5);  66.2 (23.3; 92.5) | n=83;  49.8 (22.3);  54.2 (12.5; 79.6) | n=132;  65.7 (18.5);  66.2 (34.9; 92.5) | n=40;  76.5 (15.9);  79.1 (50.6; 100.0) | **<0.001** |
| SGRQ – S | n=258;  45.0 (22.8);  44.8 (8.9; 82.4) | n=90;  40.4 (22.0);  41.8 (10.3; 79.3) | n=130;  46.3 (23.2);  46.9 (8.6; 84.4) | n=38;  51.3 (21.4);  49.2 (8.9; 88.2) | **0.031** |
| Roflumilast | 82 (11.4%) | 22 (8.3%) | 48 (13.3%) | 12 (12.9%) | 0.121 |
| ICS | 380 (52.8%) | 123 (46.2%) | 197 (54.6%) | 60 (64.5%) | **0.006** |
| ATB | 12 (1.7%) | 2 (0.8%) | 5 (1.4%) | 5 (5.4%) | **0.020** |
| Mucolytic | 164 (22.8%) | 47 (17.7%) | 88 (24.4%) | 29 (31.2%) | **0.016** |

Categorical variables are presented as absolute or relative frequencies. Statistical significance was tested by Fisher exact test.
Continuous parameters are presented as valid N, mean (SD), median (5th; 95th percentile). Statistical significance was tested by Kruskal-Wallis test.

**Legend**:GOLD - [Global Initiative for Chronic Obstructive Lung Disease](https://goldcopd.org/); SNOT - Sino-Nasal Outcome Test; SGRQ-T - St. George's Respiratory Questionnaire – total score; SGRQ-I - St. George's Respiratory Questionnaire – Impact; SGRQ-A - St. George's Respiratory Questionnaire – Activity; SGRQ-S - St. George's Respiratory Questionnaire – Symptoms; ICS – inhaled corticosteroids; ATB - antibiotics.

**Supplementary Table 2.** Distribution of clinical symptoms, quality of life measures and specific treatments in relation to GOLD 2011-16 categories („A–D“) (n=720)

|  | Total | GOLD 2011-16 („A–D“) | | | | P-value |
| --- | --- | --- | --- | --- | --- | --- |
| A | B | C | D |
| Fatigue | 336 (47.2%) | 5 (14.3%) | 65 (43.6%) | 6 (16.7%) | 260 (52.8%) | **<0.001** |
| Cough | 523 (72.6%) | 20 (57.1%) | 110 (73.3%) | 16 (44.4%) | 377 (75.6%) | **<0.001** |
| Expectoration | 422 (58.6%) | 17 (48.6%) | 78 (52.0%) | 13 (36.1%) | 314 (62.9%) | **0.001** |
| Purulent sputum | 39 (5.4%) | 1 (2.9%) | 2 (1.3%) | 2 (5.6%) | 34 (6.8%) | **0.036** |
| Haemoptysis | 37 (5.1%) | 2 (5.7%) | 10 (6.7%) | 1 (2.8%) | 24 (4.8%) | 0.772 |
| SNOT | n=572;  16.9 (15.3);  12.5 (0.0; 48.0) | n=26;  10.5 (11.9);  5.5 (0.0; 40.0) | n=120;  14.9 (14.2);  11.0 (0.0; 47.0) | n=29;  8.0 (6.8);  7.0 (0.0; 18.0) | n=397;  18.6 (15.9);  14.0 (1.0; 50.0) | **<0.001** |
| SGRQ – T | n=242;  47.4 (18.8);  49.3 (15.3; 76.3) | n=13;  22.0 (11.2);  20.4 (4.0; 47.8) | n=35;  38.7 (16.1);  39.4 (12.9; 68.8) | n=12;  21.1 (11.0);  23.4 (0.0; 35.4) | n=182;  52.6 (16.5);  52.8 (25.5; 77.6) | **<0.001** |
| SGRQ – I | n=255;  39.0 (20.6);  38.2 (6.7; 73.2) | n=14;  14.0 (9.8);  11.1 (0.0; 34.7) | n=38;  30.3 (16.8);  32.1 (5.5; 59.5) | n=14;  14.5 (9.8);  16.0 (0.0; 29.3) | n=189;  44.4 (19.2);  44.5 (14.1; 78.3) | **<0.001** |
| SGRQ – A | n=255;  62.2 (21.5);  66.2 (23.3; 92.5) | n=14;  31.3 (19.4);  35.5 (0.0; 72.3) | n=39;  53.2 (20.9);  59.5 (19.8; 85.9) | n=13;  35.9 (16.2);  41.0 (0.0; 53.6) | n=189;  68.2 (18.0);  68.7 (35.2; 92.5) | **<0.001** |
| SGRQ – S | n=258;  45.0 (22.8);  44.8 (8.9; 82.4) | n=15;  26.2 (12.9);  23.2 (10.4; 47.9) | n=42;  40.9 (20.7);  42.7 (10.7; 77.8) | n=14;  21.7 (16.7);  20.9 (0.0; 50.0) | n=187;  49.1 (22.4);  47.9 (10.0; 84.4) | **<0.001** |
| Roflumilast | 82 (11.4%) | 3 (8.6%) | 6 (4.0%) | 3 (8.3%) | 70 (14.0%) | **0.003** |
| ICS | 380 (52.8%) | 14 (40.0%) | 57 (38.0%) | 13 (36.1%) | 296 (59.3%) | **<0.001** |
| ATB | 12 (1.7%) | 0 (0.0%) | 1 (0.7%) | 0 (0.0%) | 11 (2.2%) | 0.603 |
| Mucolytic | 164 (22.8%) | 4 (11.4%) | 21 (14.0%) | 7 (19.4%) | 132 (26.5%) | **0.004** |

Categorical variables are presented as absolute or relative frequencies. Statistical significance was tested by Fisher exact test.
Continuous parameters are presented as valid N, mean (SD), median (5th; 95th percentile). Statistical significance was tested by Kruskal-Wallis test.

**Legend**:GOLD - [Global Initiative for Chronic Obstructive Lung Disease](https://goldcopd.org/); SNOT - Sino-Nasal Outcome Test; SGRQ-T - St. George's Respiratory Questionnaire – total score; SGRQ-I - St. George's Respiratory Questionnaire – Impact; SGRQ-A - St. George's Respiratory Questionnaire – Activity; SGRQ-S - St. George's Respiratory Questionnaire – Symptoms; ICS – inhaled corticosteroids; ATB - antibiotics.

**Supplementary Table 3.** Distribution of clinical symptoms, quality of life measures and specific treatments in relation to GOLD 2017 categories („A–D“) (n=720)

|  | Total | GOLD 2017 („A–D“) | | | | P-value |
| --- | --- | --- | --- | --- | --- | --- |
| A | B | C | D |
| Fatigue | 336 (47.2%) | 10 (16.4%) | 172 (45.9%) | 1 (10.0%) | 153 (57.5%) | **<0.001** |
| Cough | 523 (72.6%) | 30 (49.2%) | 272 (71.6%) | 6 (60.0%) | 215 (79.9%) | **<0.001** |
| Expectoration | 422 (58.6%) | 25 (41.0%) | 213 (56.1%) | 5 (50.0%) | 179 (66.5%) | **0.001** |
| Purulent sputum | 39 (5.4%) | 3 (4.9%) | 15 (3.9%) | 0 (0.0%) | 21 (7.8%) | 0.191 |
| Haemoptysis | 37 (5.1%) | 3 (4.9%) | 18 (4.7%) | 0 (0.0%) | 16 (5.9%) | 0.877 |
| SNOT | n=572;  16.9 (15.3);  12.5 (0.0; 48.0) | n=47;  9.3 (10.1);  6.0 (0.0; 35.0) | n=298;  15.1 (13.3);  11.0 (0.0; 42.0) | n=8;  8.4 (5.6);  8.5 (0.0; 18.0) | n=219;  21.3 (17.6);  18.0 (1.0; 55.0) | **<0.001** |
| SGRQ – T | n=242;  47.4 (18.8);  49.3 (15.3; 76.3) | n=22;  22.8 (10.8);  23.7 (4.0; 35.4) | n=116;  44.5 (15.0);  46.1 (17.5; 67.7) | n=3;  12.7 (8.6);  7.9 (7.5; 22.6) | n=101;  57.2 (17.0);  57.8 (31.7; 85.3) | **<0.001** |
| SGRQ – I | n=255;  39.0 (20.6);  38.2 (6.7; 73.2) | n=24;  15.3 (9.5);  14.4 (0.0; 32.7) | n=123;  35.7 (16.7);  36.5 (8.9; 61.6) | n=4;  8.0 (9.2);  7.4 (0.0; 17.0) | n=104;  49.6 (20.0);  49.8 (16.6; 85.7) | **<0.001** |
| SGRQ – A | n=255;  62.2 (21.5);  66.2 (23.3; 92.5) | n=23;  34.4 (18.8);  36.5 (0.0; 53.6) | n=125;  61.7 (19.0);  62.0 (24.6; 92.5) | n=4;  28.2 (10.0);  27.1 (17.4; 41.4) | n=103;  70.4 (18.8);  72.8 (35.5; 95.5) | **<0.001** |
| SGRQ – S | n=258;  45.0 (22.8);  44.8 (8.9; 82.4) | n=25;  25.5 (14.9);  23.6 (0.0; 49.4) | n=126;  41.0 (20.4);  42.7 (8.6; 74.8) | n=4;  14.8 (11.6);  15.6 (0.0; 28.2) | n=103;  55.8 (21.8);  53.9 (16.4; 88.2) | **<0.001** |
| Roflumilast | 82 (11.4%) | 5 (8.2%) | 27 (7.1%) | 1 (10.0%) | 49 (18.2%) | **<0.001** |
| ICS | 380 (52.8%) | 22 (36.1%) | 181 (47.6%) | 5 (50.0%) | 172 (63.9%) | **<0.001** |
| ATB | 12 (1.7%) | 0 (0.0%) | 3 (0.8%) | 0 (0.0%) | 9 (3.3%) | 0.078 |
| Mucolytic | 164 (22.8%) | 10 (16.4%) | 65 (17.1%) | 1 (10.0%) | 88 (32.7%) | **<0.001** |

Categorical variables are presented as absolute or relative frequencies. Statistical significance was tested by Fisher exact test.
Continuous parameters are presented as valid N, mean (SD), median (5th; 95th percentile). Statistical significance was tested by Kruskal-Wallis test.

**Legend**:GOLD - [Global Initiative for Chronic Obstructive Lung Disease](https://goldcopd.org/); SNOT - Sino-Nasal Outcome Test; SGRQ-T - St. George's Respiratory Questionnaire – total score; SGRQ-I - St. George's Respiratory Questionnaire – Impact; SGRQ-A - St. George's Respiratory Questionnaire – Activity; SGRQ-S - St. George's Respiratory Questionnaire – Symptoms; ICS – inhaled corticosteroids; ATB - antibiotics.
